# Supplementary material
Source: publisher figshare collection journal article supplement (https://frontiersin.figshare.com/ndownloader/files/17245973)
Supplement: Supplementary file [file 17245973]

**Supplementary Table 1A.** Transcription regulatory sequences (TRSs) for  $\alpha$ -GX2018A,  $\alpha$ -GX2018B and  $\alpha$ -GX2018C.

| Coronavirus       | ORF    | TRS location (CoV) (nt) | Leader TRS region and intergenic TRS (CoV) | Distance from TRS to AUG (nt) |
|-------------------|--------|-------------------------|--------------------------------------------|-------------------------------|
| $\alpha$ -GX2018A | ORF1ab | 71-76                   | UUCA <u>CUAAA</u> GAAAU                    | 219                           |
|                   | S      | 20,669-20,674           | UUCA <u>CCAAA</u> G                        | -2                            |
|                   | ORF3   | 24,753-24,758           | UUCA <u>CAUUA</u> GAACC                    | 29                            |
|                   | E      | 25,433-25,438           | UUCA <u>CUAGA</u> GAAUAU                   | 4                             |
|                   | M      | 25,670-25,675           | CAAG <u>AUAAA</u> GAAAAU                   | 4                             |
|                   | N      | 26,363-26,368           | UUAG <u>CUAAA</u> AGAAA                    | 10                            |
|                   | ORFx   | 27,568-27,573           | UUCA <u>CUAAA</u> CAAUG                    | 2                             |
| $\alpha$ -GX2018B | ORF1ab | 35-40                   | UUCA <u>CUAAA</u> GAAAU                    | 219                           |
|                   | S      | 20,633-20,638           | UUCA <u>CCAAA</u> G                        | -2                            |
|                   | ORF3   | 24,720-24,725           | UUCA <u>CAUUA</u> GAACC                    | 29                            |
|                   | E      | 25,400-25,405           | UUCA <u>CUAGA</u> GAAUAU                   | 4                             |
|                   | M      | 25,637-25,642           | CAAG <u>AUAAA</u> GAAAAU                   | 4                             |
|                   | N      | 26,330-26,335           | UUAG <u>CUAAA</u> AGAAA                    | 8                             |
|                   | ORFx   | 27,530-27,535           | UUCA <u>CUAAA</u> CAAUG                    | 2                             |
| $\alpha$ -GX2018C | ORF1ab | 32-37                   | UUCA <u>CUAAA</u> GAAAU                    | 218                           |
|                   | S      | 20,629-20,634           | UUCA <u>CCAAA</u> G                        | -2                            |
|                   | ORF3   | 24,716-24,721           | UUCA <u>CAUUA</u> GAACC                    | 29                            |
|                   | E      | 25,396-25,401           | UUCA <u>CUAGA</u> GAAUAU                   | 4                             |
|                   | M      | 25,633-25,638           | CAAG <u>AUAAA</u> GAAAAU                   | 4                             |
|                   | N      | 26,326-26,331           | UUAG <u>CUAAA</u> AGAAA                    | 8                             |
|                   | ORFx   | 27,531-27,536           | UUCA <u>CUAAA</u> CAAUG                    | 2                             |

**Supplementary Table 1B.** Transcription regulatory sequences (TRSs) for  $\beta$ -SC2018,  $\beta$ -YN2018A,  $\beta$ -YN2018C and  $\beta$ -YN2018D.

| Coronavirus                   | ORF    | TRS location (CoV) (nt) | Leader TRS region and intergenic TRS (CoV) | Distance from TRS to AUG (nt) |
|-------------------------------|--------|-------------------------|--------------------------------------------|-------------------------------|
| $\beta$ -SC2018 <sup>e</sup>  | ORF1ab | 64-69                   | UCUA <u>ACGAA</u> UUUAA                    | 191                           |
|                               | S      | 21,449-21,454           | ACUA <u>ACGAA</u> <b>AUG</b>               | 0                             |
|                               | ORF3a  | 25,181-25,186           | CAUA <u>ACGAA</u> UU <b>AUG</b>            | 3                             |
|                               | E      | 26,031-26,036           | UGAG <u>ACGAA</u> UU <b>AUG</b>            | 2                             |
|                               | M      | 26,270-26,275           | UCUA <u>ACGAA</u> UAACUA                   | 44                            |
|                               | ORF6   | 26,835-26,840           | ACAU <u>ACGAA</u> GCUUU                    | 155                           |
|                               | ORF7a  | 27,184-27,189           | UCUA <u>ACGAA</u> <b>AUG</b>               | 0                             |
|                               | ORF8a  | 27,690-27,695           | UCUA <u>ACGAA</u> <b>AUG</b>               | 0                             |
|                               | N      | 28,062-28,067           | UCUA <u>ACGAA</u> AAACU                    | 8                             |
| $\beta$ -YN2018A <sup>f</sup> | ORF1ab | 68-73                   | UCUA <u>ACGAA</u> UUUAA                    | 192                           |
|                               | S      | 21,488-21,493           | ACUA <u>ACGAA</u> <b>AUG</b>               | 0                             |
|                               | ORF3a  | 25,223-25,228           | CAUA <u>ACGAA</u> UU <b>AUG</b>            | 3                             |
|                               | E      | 26,073-26,078           | UGAG <u>ACGAA</u> UU <b>AUG</b>            | 2                             |
|                               | M      | 26,312-26,317           | UCUA <u>ACGAA</u> UAACUA                   | 44                            |
|                               | ORF6   | 26,877-26,882           | ACAU <u>ACGAA</u> GCUUU                    | 155                           |
|                               | ORF7a  | 27,231-27,236           | UCUA <u>ACGAA</u> <b>AUG</b>               | 0                             |
|                               | ORF8a  | 27,737-27,742           | UCUA <u>ACGAA</u> <b>AUG</b>               | 0                             |
|                               | N      | 28,109-28,114           | UCUA <u>ACGAA</u> AAACU                    | 8                             |
| $\beta$ -YN2018C <sup>h</sup> | ORF1ab | 65-70                   | UCUA <u>ACGAA</u> UUUAA                    | 192                           |
|                               | S      | 21,484-21,489           | ACUA <u>ACGAA</u> <b>AUG</b>               | 0                             |
|                               | ORF3a  | 25,216-25,221           | CAUA <u>ACGAA</u> UU <b>AUG</b>            | 3                             |
|                               | E      | 26,066-26,071           | UGAG <u>ACGAA</u> UU <b>AUG</b>            | 2                             |
|                               | M      | 26,305-26,310           | UCUA <u>ACGAA</u> UAACUA                   | 44                            |
|                               | ORF6   | 26,870-26,875           | ACAU <u>ACGAA</u> GCUUU                    | 155                           |
|                               | ORF7a  | 27,224-27,229           | UCUA <u>ACGAA</u> <b>AUG</b>               | 0                             |
|                               | ORF8   | 27,730-27,735           | UCUA <u>ACGAA</u> <b>AUG</b>               | 0                             |
|                               | N      | 28,102-28,107           | UCUA <u>ACGAA</u> AAACU                    | 8                             |
| $\beta$ -YN2018D <sup>i</sup> | ORF1ab | 67-72                   | UCUA <u>ACGAA</u> UUUAA                    | 192                           |
|                               | S      | 21,486-21,491           | ACUA <u>ACGAA</u> <b>AUG</b>               | 0                             |
|                               | ORF3a  | 25,218-25,223           | CAUA <u>ACGAA</u> UU <b>AUG</b>            | 3                             |
|                               | E      | 26,068-26,073           | UGAG <u>ACGAA</u> UU <b>AUG</b>            | 2                             |
|                               | M      | 26,307-26,312           | UCUA <u>ACGAA</u> UAACUA                   | 44                            |
|                               | ORF6   | 26,872-26,877           | ACAU <u>ACGAA</u> GCUUU                    | 154                           |
|                               | ORFx   | 27,227-27,232           | GAUA <u>ACGAA</u> CACU <b>AUG</b>          | 4                             |
|                               | ORF7a  | 27,747-27,752           | UCUA <u>ACGAA</u> <b>AUG</b>               | 0                             |
|                               | ORF8   | 28,253-28,258           | UCUA <u>ACGAA</u> <b>AUG</b>               | 0                             |
|                               | N      | 28,625-28,630           | UCUA <u>ACGAA</u> AAACU                    | 8                             |

**Supplementary Table 2.** Comparison of genomic features and amino acid identities between the four alpha-CoVs and representative members of lineage E.

| Virus     | Nucleotide<br>or<br>amino acid | $\alpha$ -GX2018A | $\alpha$ -GX2018B | $\alpha$ -GX2018C | $\alpha$ -GX2018D |
|-----------|--------------------------------|-------------------|-------------------|-------------------|-------------------|
|           |                                |                   |                   |                   |                   |
| BtCoV/512 | Genome                         | 97                | 97                | 97                | 97                |
|           | ORF1a                          | 96.6              | 96.6              | 97.1              | 96                |
|           | ORF1a<br>(1000-2500nt)         | 81.3              | 82                | 93.7              | 94.6              |
|           | ORF1b                          | 99.6              | 99.6              | 99.2              | 99.4              |
|           | RdRp                           | 99.4              | 99.7              | 99.7              | 99.7              |
|           | S                              | 93.4              | 96.1              | 96.2              | 61                |
|           | S1                             | 90.2              | 95.3              | 95.3              | 39.7              |
|           | ORF3                           | 99.1              | 99.1              | 96.9              | 93.4              |
|           | E                              | 100               | 100               | 98.7              | 84.8              |
|           | M                              | 99.6              | 97.3              | 98.2              | 92.2              |
|           | N                              | 98.2              | 98.7              | 98.0              | 79.3              |
|           | ORFx                           | 65.7              | 67.6              | 67.6              | 69                |
| PEDV      | Genome                         | 77                | 77                | 77                | 77                |
|           | ORF1a                          | 62.6              | 62.5              | 62.5              | 62.3              |
|           | ORF1b                          | 86.8              | 86.7              | 86.6              | 86.4              |
|           | RdRp                           | 51.1              | 51.4              | 51.4              | 51.4              |
|           | S                              | 60.4              | 60.4              | 60.5              | 60                |
|           | S1                             | 46.7              | 46.9              | 46.9              | 42.7              |
|           | ORF3                           | 58.9              | 58.9              | 58.9              | 57.3              |
|           | E                              | 77.6              | 77.6              | 78.9              | 73.4              |
|           | M                              | 80.4              | 81.8              | 80.9              | 77.7              |
|           | N                              | 52.2              | 52.6              | 52.2              | 64.9              |
|           | ORFx                           | 28.1              | 25                | 25                | 30.6              |

**Supplementary Table 3.** Comparison of genomic features and amino acid identities between the  $\alpha$ -YN2018 and representative members of lineage F.

| Virus            | Nucleotide<br>or<br>amino acid | Hi-BatCoV<br>HKU10 | Ro-BatCoV<br>HKU10 | AlphaCoV/<br>HuB2013 | Ca-batCov/K<br>enya |
|------------------|--------------------------------|--------------------|--------------------|----------------------|---------------------|
| $\alpha$ -YN2018 | Genome                         | 77%                | 78%                | 79%                  | —                   |
|                  | ORF1a                          | 70.3               | 70.7               | 72.7                 | —                   |
|                  | ORF1b                          | 89.1               | 89.1               | 92.4                 | 89.1                |
|                  | RdRp                           | 87.1               | 87.1               | 89.8                 | 86                  |
|                  | S                              | 57.3               | 56                 | 54.3                 | 55.6                |
|                  | ORF3a                          | 55.7               | 49.3               | 51.4                 | 60.6                |
|                  | ORF3b                          | —                  | —                  | —                    | —                   |
|                  | ORF3c                          | —                  | —                  | —                    | —                   |
|                  | E                              | 74.3               | 74.3               | 73.8                 | 67.6                |
|                  | M                              | 85.7               | 84.9               | 84.6                 | 81.9                |
|                  | N                              | 54.9               | 55                 | 63.9                 | 57.6                |
|                  | ORF7a                          | 13.3               | 22                 | 25                   | 16                  |
|                  | ORF7b                          | 50                 | 20                 | —                    | —                   |

**Supplementary Table 4.** Comparison of genomic features and amino acid identities between the five SARSr-CoVs and representative members of lineage B.

| Virus         | Nucleotide<br>or<br>amino acid | β-SC<br>2018 | β-YN<br>2018A | β-YN<br>2018B | β-YN<br>2018C | β-YN<br>2018D |
|---------------|--------------------------------|--------------|---------------|---------------|---------------|---------------|
| SARS<br>SZ3   | Genome                         | 92           | 96            | 96            | 97            | 97            |
|               | ORF1a                          | 94.2         | 98            | 98.1          | 98.1          | 98.2          |
|               | ORF1b                          | 98.5         | 99.5          | 99.4          | 99.4          | 99.4          |
|               | RdRp                           | 99.4         | 99.7          | 99.6          | 99.5          | 99.7          |
|               | S                              | 78.9         | 78.1          | 92.5          | 78            | 78.2          |
|               | ORF3a                          | 88.3         | 89.4          | 96            | 89.1          | 95.3          |
|               | ORF3b                          | 93.9         | 93.9          | 94.7          | 94.7          | 94.7          |
|               | E                              | 98.7         | 100           | 100           | 100           | 100           |
|               | M                              | 98.6         | 98.2          | 97.7          | 99.5          | 97.3          |
|               | ORF6                           | 100          | 98.4          | 93.7          | 98.4          | 93.7          |
|               | ORF7a                          | 91.8         | 95.9          | 94.3          | 95.1          | 94.3          |
|               | ORF7b                          | 93.2         | 93.2          | 93.2          | 93.2          | 93.2          |
|               | ORF8                           | 32.6         | 32.6          | 34.1          | 34.1          | 33.3          |
|               | N                              | 97.6         | 98.8          | 99.8          | 99.8          | 99.8          |
| SARS<br>WIV1  | Genome                         | 93           | 98            | 98            | 98            | 92            |
|               | ORF1a                          | 94.4         | 97            | 99            | 99            | 99.1          |
|               | ORF1b                          | 98.6         | 99.7          | 99.8          | 99.8          | 99.6          |
|               | RdRp                           | 99.5         | 99.8          | 99.9          | 99.8          | 99.8          |
|               | S                              | 79.1         | 78.9          | 98.8          | 78.8          | 79            |
|               | ORF3a                          | 89.4         | 90.5          | 98.2          | 90.1          | 97.1          |
|               | ORF3b                          | 94.7         | 94.7          | 95.6          | 95.6          | 95.6          |
|               | E                              | 98.7         | 100           | 100           | 100           | 100           |
|               | M                              | 97.3         | 99.5          | 100           | 98.2          | 100           |
|               | ORF6                           | 100          | 95.2          | 100           | 95.2          | 100           |
|               | ORFx                           | —            | —             | 98.8          | —             | 98.8          |
|               | ORF7a                          | 96.7         | 97.5          | 99.2          | 98.4          | 99.2          |
|               | ORF7b                          | 97.7         | 100           | 100           | 100           | 100           |
|               | ORF8                           | 91.7         | 95.9          | 100           | 100           | 99.2          |
|               | N                              | 97.4         | 98.6          | 99.5          | 99.5          | 99.5          |
| SARS<br>WIV16 | Genome                         | 93           | 93            | 99            | 93            | 95            |
|               | ORF1a                          | 94.5         | 99            | 99.1          | 99.1          | 99.2          |
|               | ORF1b                          | 98.5         | 99.3          | 99.3          | 99.2          | 99.3          |
|               | S                              | 79.4         | 78.8          | 93.4          | 78.7          | 78.8          |
|               | ORF3a                          | 89.8         | 90.9          | 98.5          | 90.5          | 97            |
|               | ORF3b                          | 94.7         | 94.7          | 95.6          | 95.6          | 95.6          |
|               | E                              | 98.7         | 100           | 100           | 100           | 100           |
|               | M                              | 97.3         | 99.5          | 100           | 98.2          | 100           |
|               | ORF6                           | 96.7         | 93.7          | 98.4          | 93.7          | 98.4          |
|               | ORFx                           | —            | —             | 98.8          | —             | 98.8          |
|               | ORF7a                          | 96.7         | 97.5          | 99.2          | 98.4          | 99.2          |
|               | ORF7b                          | 97.7         | 100           | 100           | 100           | 100           |
|               | ORF8                           | 90.9         | 95            | 99.2          | 99.2          | 100           |
|               | N                              | 97.4         | 98.3          | 99.3          | 99.3          | 99.8          |

**Supplementary Table 5.** Comparison of genomic features and amino acid identities between the  $\beta$ -GX2018 and representative members of lineage D.

| Virus           | Nucleotide<br>or<br>amino acid | Ro-BatCoV | Ro-BatCoV | BatCoV | BatCoV    | BatCoV              |
|-----------------|--------------------------------|-----------|-----------|--------|-----------|---------------------|
|                 |                                | HKU9      | GCCDC1    | HKU9-4 | HKU9-10-1 | Philippines/Diliman |
| $\beta$ -GX2018 | Genome                         | 80        | 72        | 79     | 78        | —                   |
|                 | ORF1a                          | 75.8      | 67.1      | 76.8   | 75.7      | —                   |
|                 | ORF1b                          | 90.7      | 84.9      | 90.8   | 90.6      | —                   |
|                 | RdRp                           | 86.7      | 88.6      | 88.7   | 85.2      | —                   |
|                 | S                              | 62.9      | 64.9      | 64.3   | 73        | —                   |
|                 | ORF3                           | 62.7      | 51        | 57     | 61.8      | —                   |
|                 | E                              | 85.3      | 64.5      | 88     | 88.2      | —                   |
|                 | M                              | 87.1      | 79        | 89.6   | 89.8      | 96                  |
|                 | N                              | 79.8      | 64.3      | 79.6   | 81.3      | 91                  |
|                 | ORF7a                          | 24.7      | 24.3      | 39.7   | 37.1      | 80                  |
|                 | ORF7b                          | 29.4      | 16.7      | 29.0   | 37.5      | 84.3                |
|                 | ORF7c                          | —         | 25.2      | —      | —         | 80.8                |
